# Supplementary material
Source: PubMed Central journal article supplement (PMC4317676)
Supplement: brc-0009-0391-s01.pdf [file brc-0009-0391-s01.pdf]

**Table 1.** Summary of randomized controlled studies for medical breast cancer prevention

| Study [Ref.]                                                | Study design                     | Median n FUP | Inclusion criteria | All IBC HR/RR (95% CI)                                                    | ER + IBC HR/RR (95% CI) | Breast cancer incidence (per 1,000 per year)          | Side effects                                                                                                                                   | No. breast cancer cases and no. of breast cancer related deaths in the study arms | Comments                                                                                                                                                                                                                                                                             |
|-------------------------------------------------------------|----------------------------------|--------------|--------------------|---------------------------------------------------------------------------|-------------------------|-------------------------------------------------------|------------------------------------------------------------------------------------------------------------------------------------------------|-----------------------------------------------------------------------------------|--------------------------------------------------------------------------------------------------------------------------------------------------------------------------------------------------------------------------------------------------------------------------------------|
| NSABP-P1 [14]                                               | Tam 20 mg vs. Placebo<br>5 years | 54.6 months  | 13.388             | > 60y, or 35-59y with increased BC risk ( $\geq 1.66\%$ in 5y Gail model) | RR 0.51 (0.39-0.66)     | RR 0.31 (0.22-0.45)                                   | EC RR 2.53 (1.35-4.97)<br>DVT RR 1.60 (0.91-92.86)<br>PE RR 3.10(1.15-19.27)                                                                   |                                                                                   | no signif. difference for development of ER- BC, after stopping tam was offered to placebo group!                                                                                                                                                                                    |
| NSABP-P1 [15]                                               | Tam 20 mg vs. Placebo<br>5 years | 74.0 months  | 13.207             | > 60y, or 35-59y with increased BC risk ( $\geq 1.66\%$ in 5y Gail model) | RR 0.57 (0.46-0.70)     | 6.29 vs. 3.59                                         | fractures RR = 0.68 (0.51-0.92)<br>EC RR 3.28 (1.87-6.03)<br>PE RR 2.15 (1.08-4.51)<br>DVT RR 1.44 (0.91-2.30)<br>cataract RR 1.21 (1.10-1.34) | BC 250:145 death 11:12                                                            | study unblinded when difference was significant, then tam was offered placebo group                                                                                                                                                                                                  |
| Italian Tamoxifen Prevention Study [16]                     | Tam 20 mg vs. Placebo<br>5 years | 11.2 years   | 5.408              | average BC risk, hysterectomy                                             | RR 0.84 (0.60-1.17)     | all patients 2.48 vs. 2.07<br>high risk 6.26 vs. 1.50 | thromboembolic events RR 1.63 (1.02-2.62)                                                                                                      | BC 74:62 death 2:2                                                                | 53% with bilateral ovariectomy, 39.2% interrupted treatment before completion (similar in both groups), hormonal therapy was allowed<br>high risk group (n=702): women taller than 160 cm, at least one intact ovary, < 14 years at menarche, no full-term pregnancy before 24 years |
| Royal Marsden Hospital Tamoxifen Chemoprevention Trial [19] | Tam 20 mg vs. Placebo<br>8 years | 13y 2 months | 2.471              | positive family history of BC                                             | HR 0.78 (0.58-1.04)     | HR 0.61 (0.43-0.86)                                   | 6.1 vs. 4.8<br>EC 13 vs. 5 (P=0.06)<br>cataract 9 vs. 1 (P=0.02)<br>thromboembolic events 8 vs. 3 (P=0.2)<br>fractures 9 vs. 22 (P=0.6)        | BC 104:82                                                                         |                                                                                                                                                                                                                                                                                      |

| Study [Ref.]         | Study design                                         | Median FUP  | n      | Inclusion criteria                                                                   | All IBC HR/RR (95% CI) | ER + IBC HR/RR (95% CI) | Breast cancer incidence (per 1,000 per year) | Side effects                                                                                                            | No. breast cancer cases and no. of breast cancer related deaths in the study arms | Comments                                                               |
|----------------------|------------------------------------------------------|-------------|--------|--------------------------------------------------------------------------------------|------------------------|-------------------------|----------------------------------------------|-------------------------------------------------------------------------------------------------------------------------|-----------------------------------------------------------------------------------|------------------------------------------------------------------------|
| IBIS-I [20]          | Tam 20 mg vs. Placebo 5 years                        | 96 months   | 7.154  | women with increased BC risk                                                         | RR 0.74 (0.58-0.94)    | RR 0.66 (0.50-0.87)     | 5.88 vs. 4.34                                | EC RR 1.55 (0.68-3.65)<br>DVT/PE RR 1.84 (1.21-2.82)<br>fractures RR 1.02 (0.86-1.21)<br>cataracts RR 1.24 (0.87-1.77)  | BC 168:124<br>Death 13:11                                                         |                                                                        |
| MORE [24, 25]        | Raloxifen 60 or 120 mg/d vs. Placebo 4 years         | 47.4 months | 7.705  | postmenopausal women with osteoporosis                                               | RR 0.28 (0.17-0.46)    | RR 0.16 (0.09-0.30)     | 4.7 vs. 1.3                                  | EC RR 0.8 (0.2-2.7)<br>DVT/PE 3.1 (1.5-6.2)                                                                             | BC 39:22                                                                          | secondary endpoint: breast cancer risk                                 |
| CORE [26]            | 4 additional years of raloxifene 60 mg/d vs. placebo | 8 years     | 4.011  | continuing trial of MORE study                                                       | HR 0.34 (0.22-0.50)    | HR 0.24 (0.15-0.40)     | 4.2 vs. 1.4                                  | thromboembolic events RR 2.17 (0.83 to 5.70)                                                                            | BC 58:40                                                                          |                                                                        |
| STAR (NSABP-P2) [31] | Tam 20 mg vs. raloxifene 60 mg                       | 81 months   | 19.490 | postmenopausal, $\geq 35$ y with increased BC risk ( $\geq 1.66\%$ in 5y Gail model) | RR 1.24 (1.05-1.47)    |                         | 4.04 (tam) vs. 5.02 (raloxifene)             | EC RR 0.55 (0.36-0.83)<br>PE RR 0.80 (0.57-1.11)<br>DVT RR 0.72 (0.54-0.95)<br>cataract RR 0.80 (0.72-0.89)             | BC 310 (raloxifene):247 (tamoxifen)<br>death 4 (raloxifene):11 (tam)              | raloxifene about 76% effective as tamoxifen but with less side effects |
| RUTH [23]            | raloxifene 60 mg vs. placebo                         | 5.6 years   | 10.101 | postmenopausal, $\geq 55$ y with cardiovascular risk                                 | HR 0.56 (0.38-0.83)    | HR 0.45 (0.28-0.72)     | 1.5 (raloxifene) vs. 2.7 (placebo)           | vertebral fractures HR 0.65 (0.47-0.89)<br>thromboembolic event HR 1.44 (1.06-1.95)<br>fatal stroke HR 1.49 (1.00-2.24) | BC 70:40<br>death (all cancers) 103:97                                            | no effect on cardiovascular disease                                    |

| Study [Ref.]         | Study design                               | Median n FUP | n     | Inclusion criteria                                                     | All IBC HR/RR (95% CI)                                            | ER + IBC HR/RR (95% CI)                                           | Breast cancer incidence (per 1,000 per year)        | Side effects                                                                                                                                                                                                         | No. breast cancer cases and no. of breast cancer related deaths in the study arms             | Comments                                                                                                                          |
|----------------------|--------------------------------------------|--------------|-------|------------------------------------------------------------------------|-------------------------------------------------------------------|-------------------------------------------------------------------|-----------------------------------------------------|----------------------------------------------------------------------------------------------------------------------------------------------------------------------------------------------------------------------|-----------------------------------------------------------------------------------------------|-----------------------------------------------------------------------------------------------------------------------------------|
| PEARL [27, 28]       | lasofoxifene 0.25 mg or 0.5 mg vs. placebo | 60 months    | 8,556 | 59-80 years, osteoporosis (T-score ≤2.5)                               | HR 0.82 (0.45-0.49)<br>HR 0.21 (0.08-0.55)<br>HR 0.21 (0.05-0.55) | HR 0.50 (0.22-1.11)<br>HR 0.17 (0.05-0.57)<br>HR 0.17 (0.05-0.57) | 1.97 (placebo) vs. 1.64 (0.25 mg) vs. 0.41 (0.5 mg) | vertebral fractures HR 0.58 (0.47-0.70)<br>nonvertebral fractures HR 0.76 (0.64-0.91)<br>coronary heart disease events HR 0.68 (0.50-0.93)<br>thromboembolic event HR 2.06 (1.17-3.60)<br>stroke HR 0.64 (0.41-0.99) | BC 24 (placebo): 20 (0.25mg) : 5 (0.5mg)                                                      | no increased risk for endometrial cancer                                                                                          |
| GENERATIONS [29, 30] | arzoifene 20 mg vs. placebo                | 20 months    | 54    | 9354                                                                   | 60-86 years, osteoporosis or osteopenia                           | HR 0.44 (0.26-0.76)<br>HR 0.30 (0.14-0.63)                        | 2.28 (placebo) vs. 1.01 (arzoifene)                 | fractures RR 0.97 (0.84-1.12)<br>thromboembolic events RR 2.3 (1.5-3.7)                                                                                                                                              | BC 43 (placebo): 19 (arzoifene)                                                               | no increased risk for endometrial cancer                                                                                          |
| NCIC CTG MAP.3 [35]  | exemestane 25 mg vs. placebo               | 35 months    | 4560  | ≥35 years, postmenopausal, increased BC risk (Gail model >1,66% in 5y) | HR 0.35 (0.18-0.70)                                               | HR 0.27 (0.12-0.60)                                               | 1.9 (exemestane) vs. 5.5 (placebo)                  | arthritis 6.5% vs. 4.0% (P=0.01)<br>hot flashes 18.3% vs. 11.9% (P<0.001)                                                                                                                                            | BC 11 (exemestane) : 32 (placebo)<br>BC death 1 (exemestane):0 (placebo)<br>total death 19:19 | no significant differences in frequencies of cardiovascular events, fractures, osteoporosis or colorectal and endometrial cancers |

| Study [Ref.] | Study design                         | Median FUP | n    | Inclusion criteria                                                                | All IBC HR/RR (95% CI) | ER + IBC HR/RR (95% CI) | Breast cancer incidence (per 1,000 per year) | Side effects                                                                                                                                                                                                                      | No. breast cancer cases and no. of breast cancer related deaths in the study arms                 | Comments                                                                                                                               |
|--------------|--------------------------------------|------------|------|-----------------------------------------------------------------------------------|------------------------|-------------------------|----------------------------------------------|-----------------------------------------------------------------------------------------------------------------------------------------------------------------------------------------------------------------------------------|---------------------------------------------------------------------------------------------------|----------------------------------------------------------------------------------------------------------------------------------------|
| IBIS-II [36] | anastrozole 1 mg vs. placebo 5 years | 5 years    | 3864 | 40-70 years, postmenopausal increased BC risk (10y risk > 5%, Tyrer-Cuzick model) | HR 0.50 (0.32-0.76)    | HR 0.42 (0.25-0.71)     | 8.0 vs. 4.0                                  | fractures HR 1.00 (0.98-1.03)<br>colorectal cancer HR 0.28 (0.08-0.99)<br>arthralgia HR 1.10 (1.03-1.18)<br>joint stiffness HR 1.51 (1.17-1.94)<br>carpal tunnel syndrome HR 1.58 (1.08-2.30)<br>hypertension HR 1.64 (1.18-2.28) | BC 40 (anastrozole) : 85 (placebo)<br>BC death 2 (anastrozole) : 0 (placebo)<br>total death 18:17 | no significant differences in frequencies of thromboembolic and cerebrovascular events or myocardial infarction and endometrial cancer |
